# Supplementary material for: Reliability and validity of pediatric triage tools evaluated in Low resource settings: a systematic review
Source: Springer Nature journal article supplement (doi:10.1186/s12887-017-0796-x), 2017-01-25
Supplement: MOESM3 [file 12021390]

# Triage Tools Data Abstraction

Please fill out for all abstracts you intend to include. Please email Alex with any questions!

## 1. Title

Title of Article

.....

## 2. First Author

Last name of first author

.....

## 3. Year

*Mark only one oval.*

- ☐ 2000
- ☐ 2001
- ☐ 2002
- ☐ 2003
- ☐ 2004
- ☐ 2005
- ☐ 2006
- ☐ 2007
- ☐ 2008
- ☐ 2009
- ☐ 2010
- ☐ 2011
- ☐ 2012
- ☐ 2013

## 4. RID

Refworks ID # (0-10408)

.....

**5. PDF Filename**

Name of fulltext PDF file in you're DropBox folder

.....

**6. Is the paper original research?**

Can include RCT/Cohort study/Cross sectional study/Study on tool evaluation  
*Mark only one oval.*

- ☐ Yes      *Skip to question 7.*
- ☐ No (if no explain reason under "other")      *Skip to question 8.*
- ☐ Other: .....

**Original Research****7. What type of original research study is it?**

*Mark only one oval.*

- ☐ Case Control
- ☐ Observational
- ☐ Cohort
- ☐ Randomized control trial
- ☐ Other: .....

*Skip to question 13.*

**Other Paper Type****8. What type of paper is it?**

*Mark only one oval.*

- ☐ Review (Non-Systematic)      *Skip to question 9.*
- ☐ Review (Systematic)      *Skip to question 9.*
- ☐ Letter to the Editor      *Skip to question 10.*
- ☐ Case Report      *Skip to question 10.*
- ☐ Other: ..... *Skip to question 10.*

*Skip to question 10.*

**Review (Systematic/Non-Systematic)**

**9. Abstract**

Please copy and paste the abstract below, into the text box.

.....

*Skip to question 40.*

## Other Paper Types (Letter to editor, case report, other)

**10. Primary Country**

primary country of data collection

.....

**11. Study Setting**

Type of site for investigation

*Check all that apply.*

- ☐ Level 3 National Hospital (Tertiary Hospital ICU, Pediatric department)
- ☐ Level 2 Provincial Hospital (Inpatient Ward, ED)
- ☐ Level 1 District Hospital (Inpatient Ward, triage area, no ED)
- ☐ Primary Clinic (Physician lead, no inpatient beds)
- ☐ Nurse lead clinic (Nurse lead, no inpatient beds)
- ☐ Health Outpost (community health workers, no inpatient beds)
- ☐ Pre hospital (EMT, pre hospital providers, etc.)
- ☐ Non Clinical
- ☐ Other: .....

**12. Triage Tool**

The triage tool evaluated, mentioned, used

.....

*Skip to question 40.*

## Location of Study

**13. Primary Country**

primary country of data collection

.....

**14. Secondary Country**

If only one country, leave blank

.....

**15. Study Setting**

Type of site for investigation

*Check all that apply.*

- ☐ Level 3 National Hospital (Tertiary Hospital ICU, Pediatric department)
- ☐ Level 2 Provincial Hospital (Inpatient Ward, ED)
- ☐ Level 1 District Hospital (Inpatient Ward, triage area, no ED)
- ☐ Primary Clinic (Physician lead, no inpatient beds)
- ☐ Nurse lead clinic (Nurse lead, no inpatient beds)
- ☐ Health Outpost (community health workers, no inpatient beds)
- ☐ Pre hospital (EMT, pre hospital providers, etc.)
- ☐ Non Clinical
- ☐ Other: .....

**16. Population density**

If multiple, please select more than one (self defined by author)

*Check all that apply.*

- ☐ Urban
- ☐ Rural
- ☐ Unclear

## Triage Components

**17. Triage Setting**

Setting where triage takes place/purpose of triage

*Check all that apply.*

- ☐ Military Trauma
- ☐ Military Medical
- ☐ Civilian Trauma
- ☐ Civilian Medical
- ☐ Mass Casualty
- ☐ Natural Disaster
- ☐ Specific Complaint
- ☐ Other: .....

**18. Level of Training of Provider Performing Triage**

provider tasked with performing triage in study  
*Check all that apply.*

- ☐ Physician
- ☐ Nurse
- ☐ EMT (formal training in emergency response)
- ☐ Medical Officer (hospital employee tasked with patient care assistance)
- ☐ Community Health Worker (volunteer or paid)
- ☐ Lay person (no health care training)

**19. Patient Age Group**

Adult, pediatric or both? (15 is used as minimum for adult, 18 as maximum for children)  
*Mark only one oval.*

- ☐ Adults (>15 only)
- ☐ Children (<18 only)
- ☐ Both

**20. Triage Tool 1**

Enter the name of first triage tool evaluated

.....

**21. Tool 1 Components of Evaluation**

Types of evaluation used in triage tool 1  
*Check all that apply.*

- ☐ Age of patient
- ☐ Presenting Complaint
- ☐ Vital Signs
- ☐ IMCI (Integrated Management of Childhood Illness)
- ☐ TEWS (Triage Early Warning Score)
- ☐ MEWS (Modified Early Warning System)
- ☐ Clinical Discriminator
- ☐ ETAT
- ☐ Other: .....

**22. Triage Tool 2**

Enter the name of second triage tool evaluated

.....

**23. Tool 2 Components of Evaluation**

Types of evaluation used in triage tool 2  
*Check all that apply.*

- ☐ Age of patient
- ☐ Presenting Complaint
- ☐ Vital Signs
- ☐ IMCI (Integrated Management of Childhood Illness)
- ☐ TEWS (Triage Early Warning Score)
- ☐ MEWS (Modified Early Warning System)
- ☐ Clinical Discriminator
- ☐ ETAT
- ☐ Other: .....

**24. Triage Tool 3**

Enter the name of third triage tool evaluated

.....

**25. Tool 3 Components of Evaluation**

Types of evaluation used in triage tool 3  
*Check all that apply.*

- ☐ Age of patient
- ☐ Presenting Complaint
- ☐ Vital Signs
- ☐ IMCI (Integrated Management of Childhood Illness)
- ☐ TEWS (Triage Early Warning Score)
- ☐ MEWS (Modified Early Warning System)
- ☐ Clinical Discriminator
- ☐ ETAT
- ☐ Other: .....

## Percentage at each triage scale

---

For each, please list the percent of patients (1-100) who were triaged at each level, according to the gold standard. Add multiple columns if necessary (ie for 4-5 add 4's and 5's).

**26. Emergent (Level 1, Red)**

Please list the percent of patients triaged as Emergent, per gold standard.

.....

**27. Urgent (Level 2-3, Orange-Yellow)**

Please list the percent of patients triaged as Urgent, per gold standard.

.....

**28. Non-Emergent (Level 4-5, Green)**

Please list the percent of patients triaged as Non-Emergent, per gold standard.

.....

**29. Uncategorized**

Please list the percent of patients triaged as Uncategorized, per gold standard.

.....

**30. Tool Evaluation Components?**

Did the study evaluate the reliability, validity, both or neither of the triage tools?  
*Mark only one oval.*

- ☐ Reliability (between grader or between tool comparison) *Skip to question 31.*
- ☐ Validity (triage grade compared to outcome) *Skip to question 36.*
- ☐ Both *Skip to question 31.*
- ☐ Neither (Descriptive Study) *Skip to question 40.*
- ☐ Over and Under Triage *Skip to question 36.*
- ☐ Waiting Time *Skip to question 40.*
- ☐ Other: .....

## Reliability Metrics

**31. What was the gold standard used?**

ie Which test (or grader) was used as the current standard for comparison?

.....

## Reliability Statistics

---

Statistical measures of reliability between scores or graders

**32. Percent agreement?**

If measured, what was the percent agreement between the tests?

.....

**33. Kappa Statistic?**

If measured, what was the kappa statistic between the tests?

.....

**34. Was validity also measured?**

Did the authors compare scores to a clinical outcome (validity)?  
*Mark only one oval.*

☐ Yes

☐ No

**35. Any additional information from results section**

.....

.....

.....

.....

.....

## Validity Metrics

**36. Outcome measure?**

What outcome measure was used?  
*Check all that apply.*

☐ Mortality

☐ General Hospitalization

☐ ICU Admission

☐ High Care

☐ Other: .....



**37. What timepoint was given for followup?**

What was the maximum time that the authors evaluated their outcome?  
*Mark only one oval.*

- ☐ Same admission
- ☐ 1-3 days
- ☐ 3-7 days
- ☐ 1-4 weeks
- ☐ >4 weeks

**38. Outcome odds result**

Please write a sentence describing the outcome odds result obtained (ie Emergent triage grade under triage tool A had 2.5x higher odds of outcome A etc.)

---

---

---

---

---

**39. Any additional information from results section**

---

---

---

---

---

## Comments

**40. Comments**

Include comments on study quality.

---

---

---

---

---
